# Supplementary material for: Silver modified carbon quantum dots for solvent-free selective oxidation of cyclohexane
Source: Royal Society of Chemistry journal article supplement (doi:10.1039/c4nj02256d), 2015-01-01
Supplement: c4nj02256d1.pdf [file c4nj02256d1.pdf]

**Electronic Supplementary Material (ESI) for New Journal of Chemistry.**

**This journal is © The Royal Society of Chemistry and the Centre National de la Recherche Scientifique 2015**

**To New Journal of Chemistry**

**Supplementary Information for**

**Silver modified carbon quantum dots for solvent-free**

**selective oxidation of cyclohexane**

Yanmei Yang, Naiyun Liu, Shi Qiao, Ruihua Liu, Hui Huang\* and Yang Liu

*Jiangsu Key Laboratory for Carbon-Based Functional Materials & Devices, Institute of Functional Nano & Soft Materials (FUNSOM), Soochow University, 199 Ren'ai Road, Suzhou, 215123, Jiangsu, PR China.*

*E-Mail: [hhuang0618@suda.edu.cn](mailto:hhuang0618@suda.edu.cn).*

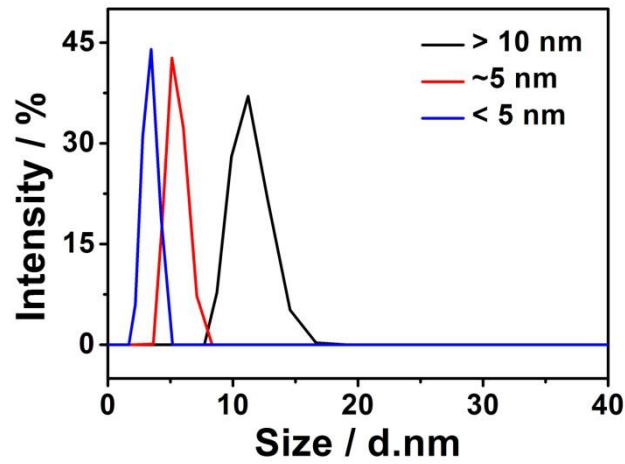

**Fig. S1** DLS size distribution histograms of CQDs with different sizes: <5 nm, ~5 nm and >10 nm.

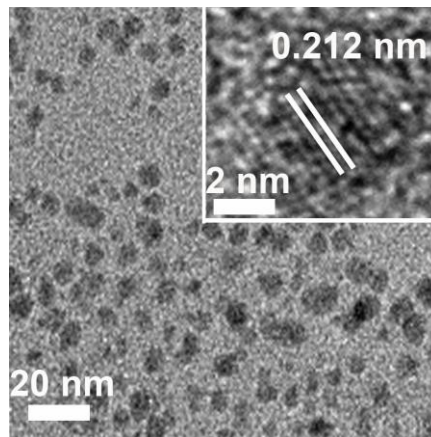

**Fig. S2** Typical TEM image of CQDs.

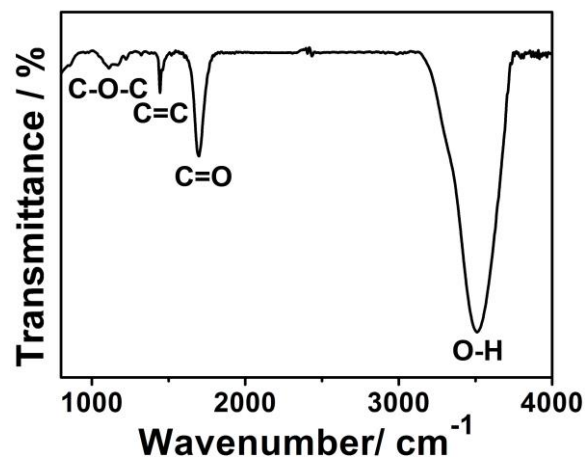

**Fig. S3** The FT-IR spectrum of CQDs.

**Table S1** Selective oxidation of cyclohexane with Ag/CQDs as catalyst.<sup>a</sup>

| Reaction time<br>[h] | Conversion<br>[%] | Selectivity [%]   |        |                   |
|----------------------|-------------------|-------------------|--------|-------------------|
|                      |                   | -one <sup>b</sup> | KA oil | Epo- <sup>c</sup> |
| 6                    | 16.1              | 90.2              | 97.6   | 2.3               |
| 12                   | 30.3              | 89.8              | 97.1   | 2.8               |
| 24                   | 43.6              | 88.6              | 96.4   | 3.5               |
| 36                   | 51.9              | 85.9              | 95.9   | 4.0               |
| 48                   | 58.9              | 84.6              | 95.2   | 4.7               |

<sup>a</sup>Reaction conditions: cyclohexane 10 mL; catalyst 20.0 mg; reaction time 48 h; temperature 60 °C; TBHP 10 mL; visible light. <sup>b</sup>-one = cyclohexanone, <sup>c</sup>Epo- = epoxycyclohexane.

**Table S2** Selective oxidation of cyclohexane with Ag/CQDs as catalyst over cycling ten times.<sup>a</sup>

| Cycle times | Conversion<br>[%] | Selectivity [%]   |        |                   |
|-------------|-------------------|-------------------|--------|-------------------|
|             |                   | -one <sup>b</sup> | KA oil | Epo- <sup>c</sup> |
| 1           | 58.9              | 84.6              | 95.2   | 4.7               |
| 2           | 58.8              | 84.1              | 94.7   | 5.2               |
| 3           | 58.3              | 83.9              | 94.9   | 5.0               |
| 4           | 58.7              | 83.6              | 95.1   | 4.8               |
| 5           | 58.0              | 84.2              | 93.8   | 6.1               |
| 6           | 58.5              | 84.0              | 94.6   | 5.3               |
| 7           | 58.4              | 83.6              | 95.2   | 4.7               |

|    |      |      |      |     |
|----|------|------|------|-----|
| 8  | 58.9 | 83.8 | 94.9 | 5.0 |
| 9  | 58.2 | 84.5 | 94.7 | 5.2 |
| 10 | 58.5 | 84.1 | 95.0 | 4.9 |

<sup>a</sup>Reaction conditions: solvent-free cyclohexane 10 mL; catalyst 20.0 mg; reaction time 48 h; temperature 60 °C; TBHP 10 mL; visible light. <sup>b</sup>-one = cyclohexanone, <sup>c</sup>Epo- = epoxycyclohexane.

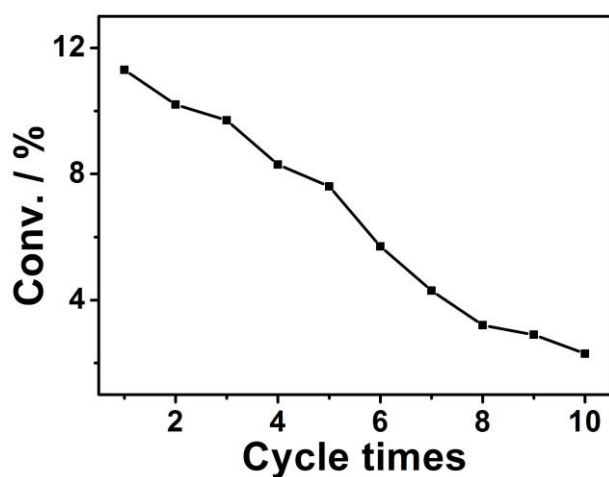

**Fig. S4** The conversion of cyclohexane with Ag NPs as catalyst over cycling for 10 times.

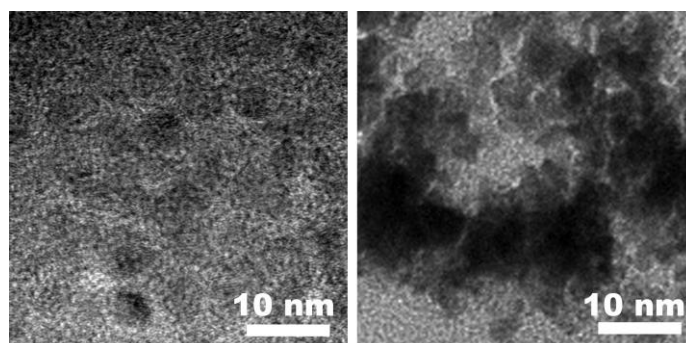

**Fig. S5** Typical TEM images of Ag NPs (a) before and (b) after ten repeated

consecutive runs, respectively.

**Table S3** Selective oxidation of cyclohexane to cyclohexanone with Ag/CQDs as catalyst under different light conditions or not.<sup>a</sup>

| Light condition | Conversion [%] | Selectivity to cyclohexanone [%] |
|-----------------|----------------|----------------------------------|
| Visible light   | 58.9           | 84.6                             |
| UV light        | 13.1           | 80.6                             |
| IR light        | 10.1           | 79.3                             |
| In dark         | 4.6            | 76.5                             |

<sup>a</sup>Reaction conditions: solvent-free cyclohexane 10 mL; catalyst 20.0 mg; reaction time 48 h; temperature 60 °C; TBHP 10 mL.

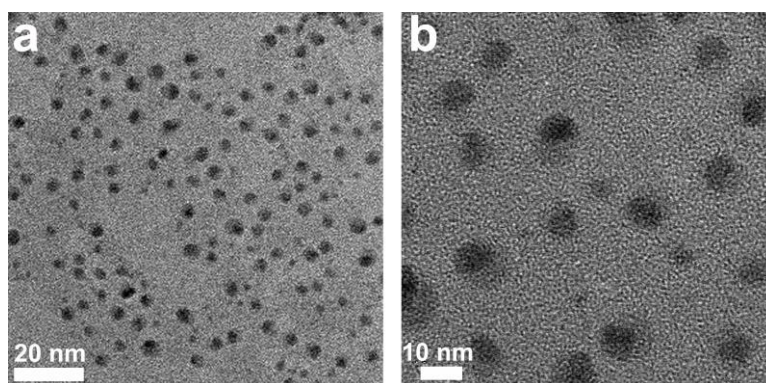

**Fig. S6** Typical TEM images of Ag/CQDs with different sizes: (a) < 5 nm, (b) > 10 nm.

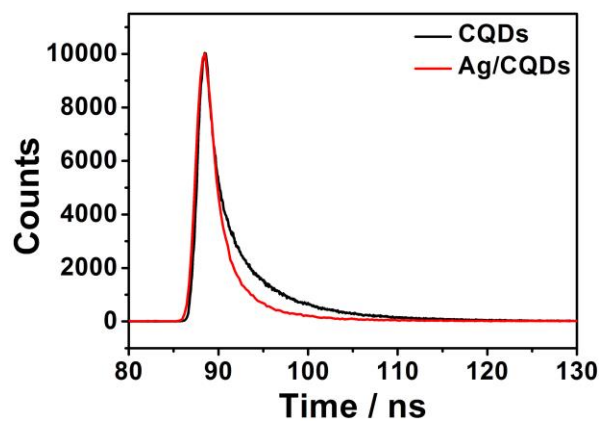

**Fig. S7** The luminescence decays of CQDs and Ag/CQDs (410 nm excitation, monitored with a 550 nm narrow bandpassfilter).
